# Supplementary material
Source: ML conference proceedings conference paper supplement (https://openreview.net/forum?id=Xu6K3lGBPAS)
Supplement: supplementary_material [file attachment]

## A APPENDICES

### A.1 PROOF OF THEOREM 2

*Proof.* Let's try expanding  $\frac{\partial^2 L(\hat{\theta}_\epsilon, \mathcal{D})}{\partial \epsilon^2}$  for the first time:

$$\begin{aligned}
\frac{\partial^2 L(\hat{\theta}_\epsilon, \mathcal{D})}{\partial \epsilon^2} &= \frac{\partial \left( \frac{\partial L(\hat{\theta}_\epsilon, \mathcal{D})}{\partial \epsilon} \right)}{\partial \epsilon} \\
&= \frac{\partial \left( \left( \frac{\partial L(\hat{\theta}_\epsilon, \mathcal{D})}{\partial \theta} \right)^T \cdot \frac{\partial \hat{\theta}_\epsilon}{\partial \epsilon} \right)}{\partial \epsilon} \\
&= \left( \frac{\partial^2 L(\hat{\theta}_\epsilon, \mathcal{D})}{\partial \theta \partial \epsilon} \right)^T \cdot \frac{\partial \hat{\theta}_\epsilon}{\partial \epsilon} + \left( \frac{\partial L(\hat{\theta}_\epsilon, \mathcal{D})}{\partial \theta} \right)^T \cdot \frac{\partial^2 \hat{\theta}_\epsilon}{\partial \epsilon^2} \\
&= \left( \frac{\partial \hat{\theta}_\epsilon}{\partial \epsilon} \right)^T \cdot \frac{\partial^2 L(\hat{\theta}_\epsilon, \mathcal{D})}{\partial \theta^2} \cdot \frac{\partial \hat{\theta}_\epsilon}{\partial \epsilon} + \left( \frac{\partial L(\hat{\theta}_\epsilon, \mathcal{D})}{\partial \theta} \right)^T \cdot \frac{\partial^2 \hat{\theta}_\epsilon}{\partial \epsilon^2}
\end{aligned} \tag{20}$$

To go on, we need to expand  $\frac{\partial^2 \hat{\theta}_\epsilon}{\partial \epsilon^2}$ , which is as follows:

$$\begin{aligned}
\frac{\partial^2 \hat{\theta}_\epsilon}{\partial \epsilon^2} &= \frac{\partial \left( \frac{\partial \hat{\theta}_\epsilon}{\partial \epsilon} \right)}{\partial \epsilon} \\
&= \frac{\partial \left( -W_\epsilon^{-1} \cdot \left( \frac{1}{n} \mathbf{b}'_\epsilon + \delta'_\epsilon \cdot \hat{\theta}_\epsilon \right) \right)}{\partial \epsilon} \\
&= -\frac{\partial (W_\epsilon^{-1})}{\partial \epsilon} \cdot \left( \frac{1}{n} \mathbf{b}'_\epsilon + \delta'_\epsilon \cdot \hat{\theta}_\epsilon \right) - W_\epsilon^{-1} \cdot \frac{\partial \left( \frac{1}{n} \mathbf{b}'_\epsilon + \delta'_\epsilon \cdot \hat{\theta}_\epsilon \right)}{\partial \epsilon} \\
&= W_\epsilon^{-1} \cdot \frac{\partial W_\epsilon}{\partial \epsilon} \cdot W_\epsilon^{-1} \cdot \left( \frac{1}{n} \mathbf{b}'_\epsilon + \delta'_\epsilon \cdot \hat{\theta}_\epsilon \right) - W_\epsilon^{-1} \cdot \left( \frac{1}{n} \cdot \frac{\partial \mathbf{b}'_\epsilon}{\partial \epsilon} + \frac{\delta'_\epsilon}{\partial \epsilon} \cdot \hat{\theta}_\epsilon + \delta'_\epsilon \cdot \frac{\partial \hat{\theta}_\epsilon}{\partial \epsilon} \right) \\
&= W_\epsilon^{-1} \cdot \left( \frac{\partial^3 L(\hat{\theta}_\epsilon, \mathcal{D})}{\partial \theta^3} + \delta'_\epsilon \cdot \mathbf{I} \right) \cdot \frac{\partial \hat{\theta}_\epsilon}{\partial \epsilon} - W_\epsilon^{-1} \cdot \left( \frac{1}{n} \cdot \frac{\partial \mathbf{b}'_\epsilon}{\partial \epsilon} + \frac{\delta'_\epsilon}{\partial \epsilon} \cdot \hat{\theta}_\epsilon + \delta'_\epsilon \cdot \frac{\partial \hat{\theta}_\epsilon}{\partial \epsilon} \right)
\end{aligned} \tag{21}$$

Finally, let  $\mathbf{b}''_\epsilon = \frac{\partial \mathbf{b}'_\epsilon}{\partial \epsilon}$ ,  $\delta''_\epsilon = \frac{\partial \delta'_\epsilon}{\partial \epsilon}$ ,  $H_{\hat{\theta}_\epsilon} = \frac{\partial^2 L(\hat{\theta}_\epsilon, \mathcal{D})}{\partial \theta^2}$  and  $T_{\hat{\theta}_\epsilon} = \frac{\partial^3 L(\hat{\theta}_\epsilon, \mathcal{D})}{\partial \theta^3}$

$$\begin{aligned}
\frac{\partial^2 L(\hat{\theta}_\epsilon, \mathcal{D})}{\partial \epsilon^2} &= \left( \frac{1}{n} \mathbf{b}'_\epsilon + \delta'_\epsilon \cdot \hat{\theta}_\epsilon \right)^T \cdot W_\epsilon^{-1} \cdot H_{\hat{\theta}_\epsilon} \cdot W_\epsilon^{-1} \cdot \left( \frac{1}{n} \mathbf{b}'_\epsilon + \delta'_\epsilon \cdot \hat{\theta}_\epsilon \right) \\
&\quad - (\nabla_\theta L(\hat{\theta}_\epsilon, \mathcal{D}))^T \cdot W_\epsilon^{-1} \cdot (T_{\hat{\theta}_\epsilon} + \delta'_\epsilon \cdot \mathbf{I}) \cdot W_\epsilon^{-1} \cdot \left( \frac{1}{n} \mathbf{b}'_\epsilon + \delta'_\epsilon \cdot \hat{\theta}_\epsilon \right) \\
&\quad - (\nabla_\theta L(\hat{\theta}_\epsilon, \mathcal{D}))^T \cdot W_\epsilon^{-1} \cdot \left( \frac{1}{n} \cdot \mathbf{b}''_\epsilon + \delta''_\epsilon \cdot \hat{\theta}_\epsilon \right) \\
&\quad + (\nabla_\theta L(\hat{\theta}_\epsilon, \mathcal{D}))^T \cdot W_\epsilon^{-1} \cdot \delta'_\epsilon \cdot W_\epsilon^{-1} \cdot \left( \frac{1}{n} \mathbf{b}'_\epsilon + \delta'_\epsilon \cdot \hat{\theta}_\epsilon \right)
\end{aligned} \tag{22}$$

which concludes the proof.  $\square$

### A.2 PROOF OF THEOREM 3

*Proof.* According to the assumptions in Theorem 3, the error bound depends on  $\mathbf{b}'_\epsilon$ ,  $\mathbf{b}''_\epsilon$ ,  $\delta_{\hat{\theta}_\epsilon}$ ,  $\delta'_{\hat{\theta}_\epsilon}$  and  $\delta''_{\hat{\theta}_\epsilon}$ .

We first bound  $\mathbf{b}'_\epsilon$  and  $\mathbf{b}''_\epsilon$ . Note that  $\beta_\epsilon$  is defined as 4 and  $\mathbf{b}'_\epsilon$  can be calculated by 13, it is easy to figure out the following:  $\|\mathbf{b}'_\epsilon\| = \mathcal{O}(\frac{1}{\epsilon^2})$ ,  $\|\mathbf{b}''_\epsilon\| = \mathcal{O}(\frac{1}{\epsilon^3})$ .

Next, we will bound  $\delta_{\hat{\theta}_\epsilon}$ ,  $\delta'_{\hat{\theta}_\epsilon}$  and  $\delta''_{\hat{\theta}_\epsilon}$ . With the fact that  $\epsilon < 1$ , we have  $e^{\frac{\epsilon}{4}} - 1 = \frac{\epsilon}{4} + o(\epsilon)$ . With the definition of  $\delta_{\hat{\theta}_\epsilon}$  in 4, we have  $\|\delta_{\hat{\theta}_\epsilon}\| = \mathcal{O}(\frac{1}{n\epsilon})$ ,  $\|\delta'_{\hat{\theta}_\epsilon}\| = \mathcal{O}(\frac{1}{n\epsilon^2})$  and  $\|\delta''_{\hat{\theta}_\epsilon}\| = \mathcal{O}(\frac{1}{n\epsilon^3})$ .

Finally, we get our error bound as follows:

$$\mathcal{O} \left( \frac{(\epsilon' - \epsilon)^2}{n^2 \epsilon^4} \right),$$

which concludes the proof.  $\square$

## A.3 SUPPLEMENTARY EXPERIMENTAL RESULTS

Table 2: Average error of estimated loss for measuring point from  $\epsilon = 0.05$  to  $\epsilon = 0.35$ .

| $\epsilon$  | 0.05    | 0.10    | 0.15    | 0.20    | 0.25           | 0.30           | 0.35           |
|-------------|---------|---------|---------|---------|----------------|----------------|----------------|
| Adlut-LR    | 0.01982 | 0.00823 | 0.00908 | 0.00408 | <b>0.00003</b> | 0.00033        | 0.00004        |
| Adlut-SVM   | 0.08188 | 0.02052 | 0.00327 | 0.00315 | 0.00445        | 0.00367        | 0.00385        |
| Kddcup-LR   | 0.05884 | 0.02393 | 0.00930 | 0.00721 | 0.00763        | 0.00845        | 0.00960        |
| Kddcup-SVM  | 0.04735 | 0.00866 | 0.00798 | 0.00793 | 0.00851        | 0.01052        | 0.01143        |
| Gisette-LR  | 0.18427 | 0.01482 | 0.01181 | 0.02125 | 0.01931        | <b>0.00302</b> | 0.00810        |
| Gisette-SVM | 0.16245 | 0.00571 | 0.02480 | 0.00822 | 0.00567        | 0.01023        | <b>0.00550</b> |

Table 3: Average error of estimated loss for measuring point from  $\epsilon = 0.40$  to  $\epsilon = 0.70$ .

| $\epsilon$  | 0.40    | 0.45           | 0.50    | 0.55    | 0.60    | 0.65    | 0.70    |
|-------------|---------|----------------|---------|---------|---------|---------|---------|
| Adlut-LR    | 0.00037 | 0.00293        | 0.00309 | 0.00283 | 0.00339 | 0.00623 | 0.00643 |
| Adlut-SVM   | 0.00558 | <b>0.00298</b> | 0.00585 | 0.00890 | 0.00833 | 0.00711 | 0.00546 |
| Kddcup-LR   | 0.00677 | <b>0.00283</b> | 0.00778 | 0.00442 | 0.00768 | 0.01010 | 0.01274 |
| Kddcup-SVM  | 0.00954 | 0.00848        | 0.00967 | 0.00486 | 0.00363 | 0.00154 | 0.00200 |
| Gisette-LR  | 0.00372 | 0.00394        | 0.01361 | 0.01420 | 0.01423 | 0.02461 | 0.03560 |
| Gisette-SVM | 0.00712 | 0.00823        | 0.00823 | 0.00961 | 0.00926 | 0.01188 | 0.01327 |

Table 4: Average error of estimated loss for measuring point from  $\epsilon = 0.75$  to  $\epsilon = 1$ .

| $\epsilon$  | 0.75    | 0.80    | 0.85           | 0.90    | 0.95    | 1.00    |
|-------------|---------|---------|----------------|---------|---------|---------|
| Adlut-LR    | 0.00649 | 0.01169 | 0.01480        | 0.01485 | 0.01675 | 0.02276 |
| Adlut-SVM   | 0.00770 | 0.00780 | 0.00840        | 0.01142 | 0.01053 | 0.01020 |
| Kddcup-LR   | 0.01186 | 0.01288 | 0.01200        | 0.01149 | 0.01147 | 0.01213 |
| Kddcup-SVM  | 0.00112 | 0.00137 | <b>0.00038</b> | 0.00134 | 0.00192 | 0.00250 |
| Gisette-LR  | 0.04637 | 0.04476 | 0.03693        | 0.03683 | 0.03308 | 0.03828 |
| Gisette-SVM | 0.01745 | 0.03641 | 0.02911        | 0.03548 | 0.04540 | 0.03603 |

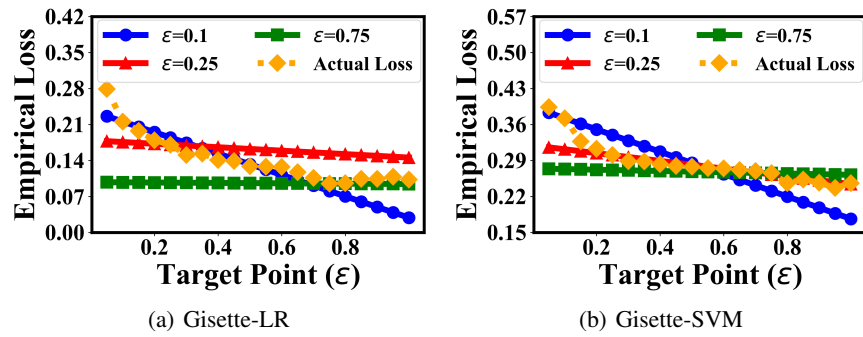

Figure 3: Performance of our approximation approach on Gisette with logistic regression (LR) loss and Huber SVM (SVM) loss
